# Supplementary material for: Ring-Opening Polymerization of Cyclohexene Oxide and Cycloaddition with CO2 Catalyzed by Amine Triphenolate Iron(III) Complexes
Source: MDPI journal article supplement (doi:10.3390/molecules29092139), 2024-05-04
Supplement: s1 [file s1]

## **Supporting information**

### **Ring opening polymerization of cyclohexene oxide and cycloaddition with CO<sub>2</sub> catalyzed by amine triphenol iron(III) complexes**

Peng Li<sup>a</sup>, Sixuan Li<sup>a</sup>, Xin Dai<sup>a</sup>, Shifeng Gao<sup>b</sup>, Zhaozheng Song<sup>a\*</sup>, and Qingzhe Jiang<sup>a,c\*</sup>

<sup>a</sup>State Key Laboratory of Heavy Oil Processing, College of Science, China University of Petroleum, Beijing 102249, PR China

<sup>b</sup>CNPC Engineering Technology R&D Company Ltd., Beijing 102206, China

<sup>c</sup>School of International Trade and Economics, University of International Business and Economics, Beijing 100029, PR China

## CONTENTS

|                                                                                                                    |    |
|--------------------------------------------------------------------------------------------------------------------|----|
| <b>Supporting information</b> .....                                                                                | 1  |
| CONTENTS .....                                                                                                     | 2  |
| <b>Experimental section</b> .....                                                                                  | 4  |
| <b>Scheme S1.</b> Synthesis of 2,4-dichloro-6-chloromethylphenol.....                                              | 4  |
| <b>Figure S1.</b> <sup>1</sup> H NMR spectrum of ligand-1 .....                                                    | 5  |
| <b>Figure S2.</b> <sup>13</sup> C NMR spectrum of ligand-1 .....                                                   | 5  |
| <b>Figure S3.</b> <sup>1</sup> H NMR spectrum of ligand-2 .....                                                    | 6  |
| <b>Figure S4.</b> <sup>13</sup> C NMR spectrum of ligand-2 .....                                                   | 6  |
| <b>Figure S5.</b> <sup>1</sup> H NMR spectrum of ligand-3 .....                                                    | 7  |
| <b>Figure S6.</b> <sup>13</sup> C NMR spectrum of ligand-3 .....                                                   | 7  |
| <b>Figure S7.</b> <sup>1</sup> H NMR spectrum of ligand-4 .....                                                    | 8  |
| <b>Figure S8.</b> <sup>13</sup> C NMR spectrum of ligand-4 .....                                                   | 8  |
| <b>Figure S9.</b> HRMS of complex-1 (positive mode).....                                                           | 9  |
| <b>Figure S10.</b> HRMS of complex-2 (positive mode).....                                                          | 9  |
| <b>Figure S11.</b> HRMS of complex-3 (positive mode).....                                                          | 10 |
| <b>Figure S12.</b> HRMS of complex-4 (positive mode).....                                                          | 10 |
| <b>Figure S13.</b> UV-vis spectra of ligands 1-4 and complexes 1-4 .....                                           | 11 |
| <b>Figure S14.</b> IR spectra of ligands 1-4 and complexes 1-4 .....                                               | 11 |
| <b>Figure S15.</b> UV-vis spectra of complexes 1-4 titrated with 500 equivalent of CHO .....                       | 12 |
| <b>Figure S16.</b> HRMS of (a) complex-1 and (b) complex-4 and PPNCI in a molar ratio of 1:2 (negative mode) ..... | 13 |
| <b>Figure S17.</b> IR spectrum of PCHO .....                                                                       | 14 |
| <b>Figure S18.</b> <sup>1</sup> H NMR spectrum of PCHO.....                                                        | 15 |
| <b>Figure S19.</b> DSC polts of PCHO (Table 1) .....                                                               | 16 |
| <b>Figure S20</b> TG and DTG curves of PCHO.....                                                                   | 16 |
| <b>Figure S21.</b> UV spectrum of complex C4 with different equivalent TBAB .....                                  | 17 |
| <b>Figure S22.</b> HRMS spectrum of complex C4 and TBAB in a molar ratio of 1:2 (Negative mode).....               | 17 |
| <b>Analysis of CHO ring opening polymerization</b> .....                                                           | 18 |
| <b>Analysis of CHO/CO<sub>2</sub> cycloaddition reactions:</b> .....                                               | 18 |

|                       |           |
|-----------------------|-----------|
| <b>Reference.....</b> | <b>19</b> |
|-----------------------|-----------|

## Experimental section

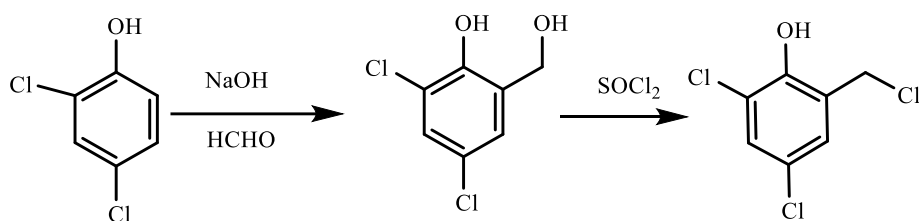

**Scheme S1.** Synthesis of 2,4-dichloro-6-chloromethylphenol

### Synthesis of 2, 4-dichloro-6-hydroxymethylphenol:

15 mL of deionized water was added to the flask, followed by the addition of sodium hydroxide (1.3 g, 63 mmol). The mixture was stirred for 15 min until the sodium hydroxide had completely dissolved. Next, 2,4-dichlorophenol (5 g, 100 mmol) was added and dissolved in the reaction mixture. Formaldehyde solution (37%-40%, 6.0 mL, 167.6 mmol) was then added, and the mixture was stirred at 50 °C for 48 hours. During this process, the color of the reaction mixture gradually changed from light yellow to yellow to dark red. After the reaction stopped, the resulting solution was transferred to a beaker, and its pH was adjusted to about 3 with hydrochloric acid while stirring to give a deep red oily substance. This oily substance was extracted with dichloromethane (CH<sub>2</sub>Cl<sub>2</sub>) three times using 50 mL portions. The CH<sub>2</sub>Cl<sub>2</sub> extract was washed with saturated salt water and dried with anhydrous sodium sulfate. Finally, the CH<sub>2</sub>Cl<sub>2</sub> extract was recrystallized to give a white solid product (8.3 g, 76.7% yield). <sup>1</sup>H NMR (500 MHz, CDCl<sub>3</sub>) δ 7.28 (s, 1H, ArH), 7.11 (s, 1H, ArH), 6.70 (s, 1H, ArH), 4.76 (s, 2H, ArCH<sub>2</sub>OH), 2.44 (s, 1H, ArCH<sub>2</sub>OH).

### Synthesis of 2,4-dichloro-6-chloromethylphenol:

Under an argon atmosphere, a 100 mL reaction flask was charged with 30 mL of anhydrous dichloromethane, 2,4-di-tert-butyl-6-hydroxymethylphenol (0.92 g, 5 mmol) was added and stirred until completely dissolved. Subsequently, sulfoxide chloride (0.5 mL, 6.67 mmol) was slowly added dropwise and the reaction mixture was kept at 30 °C for 10 hours. The solvent and unreacted sulfoxide chloride were removed using a rotary evaporator, and the white solid (0.98 g, 98%) was obtained by vacuum drying overnight<sup>[1]</sup>. <sup>1</sup>H NMR (500 MHz, CDCl<sub>3</sub>) δ 7.32 (d, *J* = 2.4 Hz, 1H, ArH), 7.28 (d, *J* = 2.3 Hz, 1H, ArH), 5.77 (s, 1H, ArOH), 4.62 (s, 2H, ArCH<sub>2</sub>Cl).

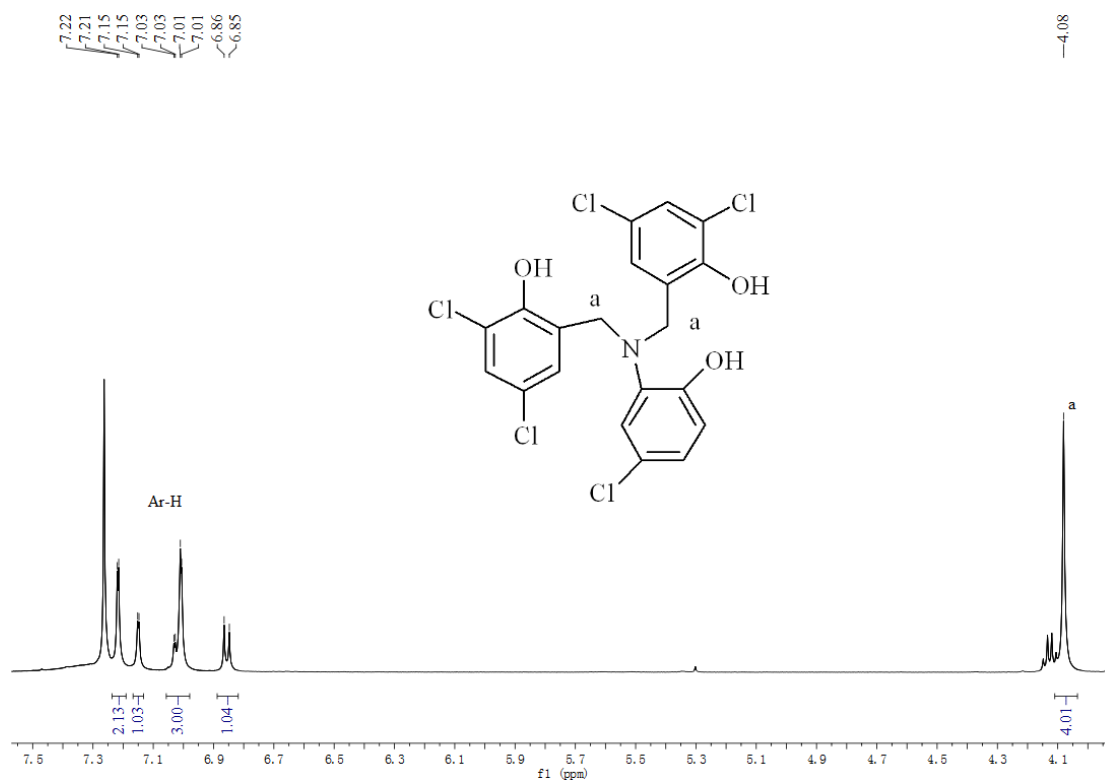

**Figure S1.**  $^1\text{H}$  NMR spectrum of ligand-1

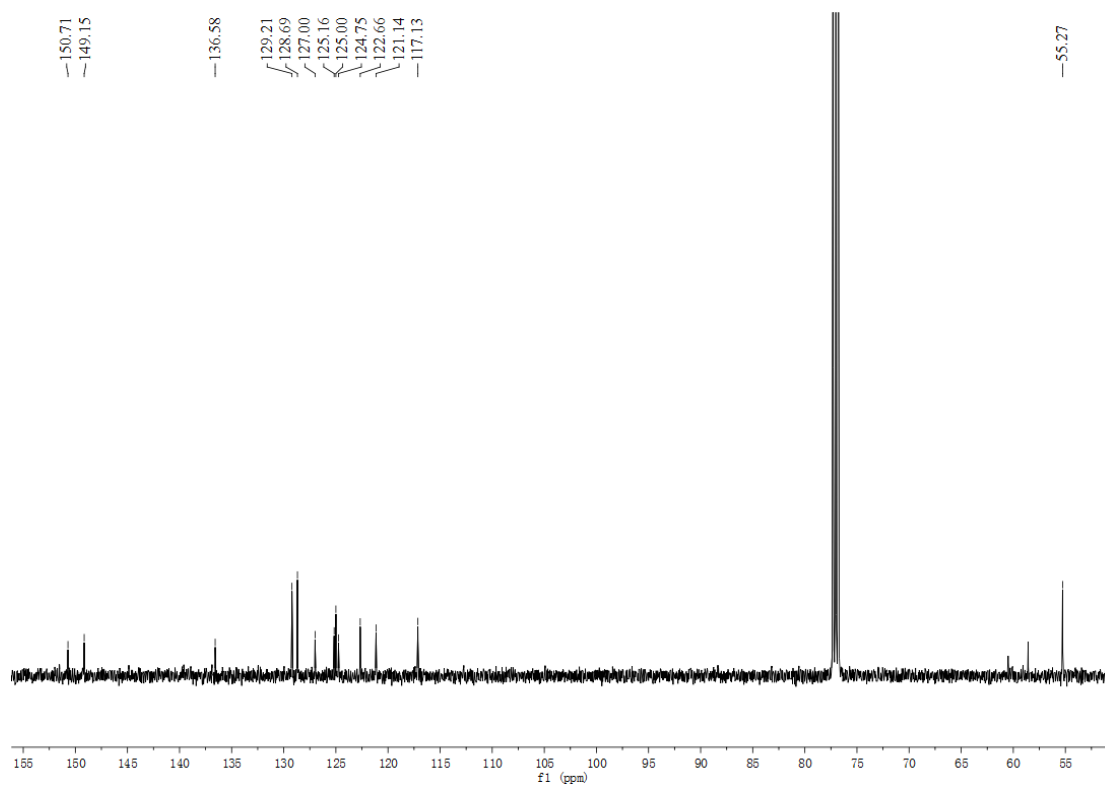

**Figure S2.**  $^{13}\text{C}$  NMR spectrum of ligand-1

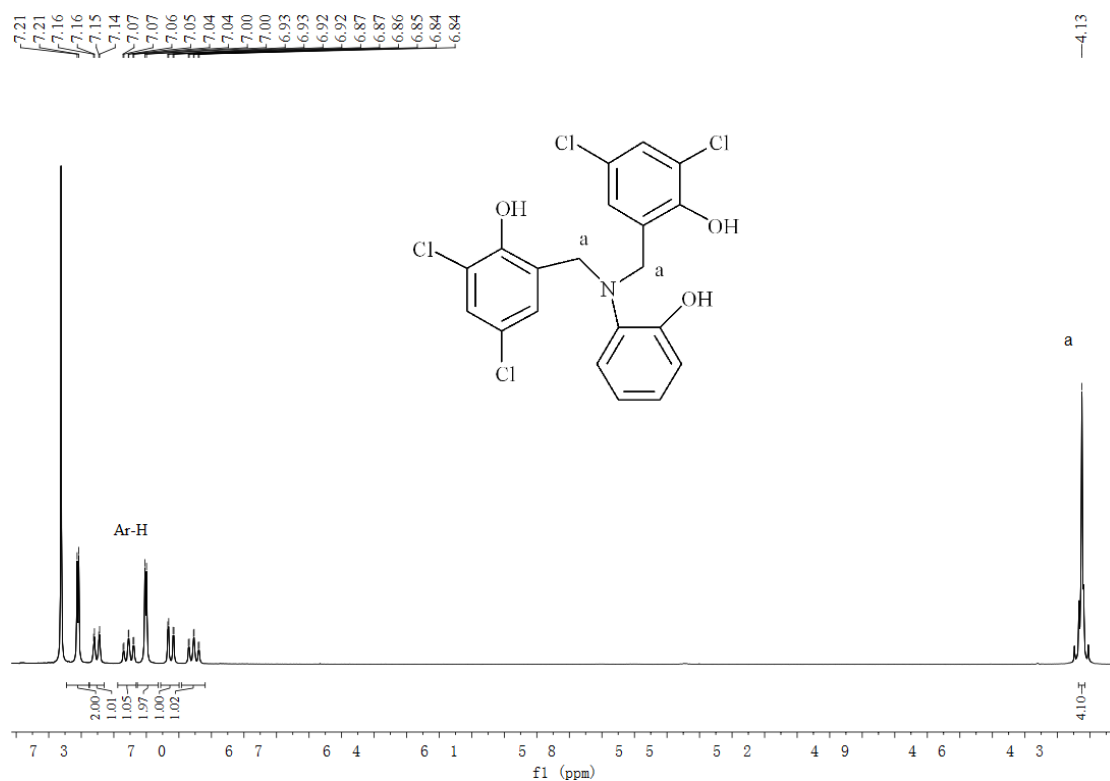

**Figure S3.** <sup>1</sup>H NMR spectrum of ligand-2

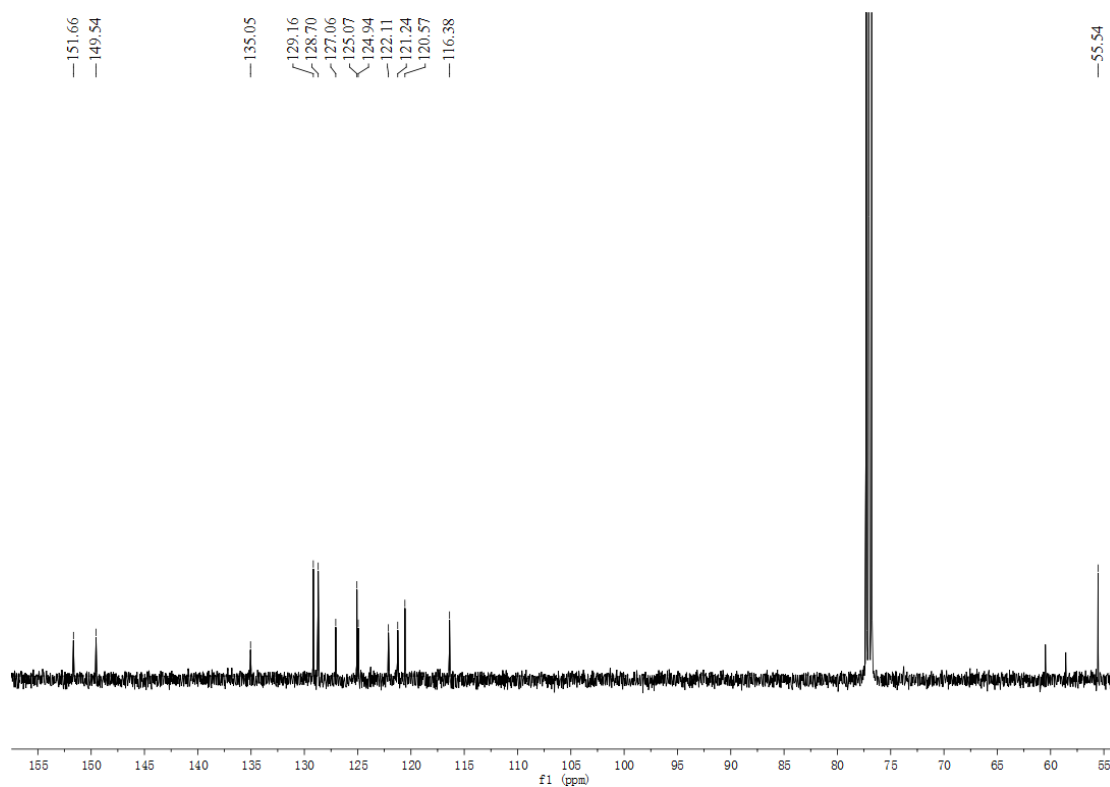

**Figure S4.** <sup>13</sup>C NMR spectrum of ligand-2

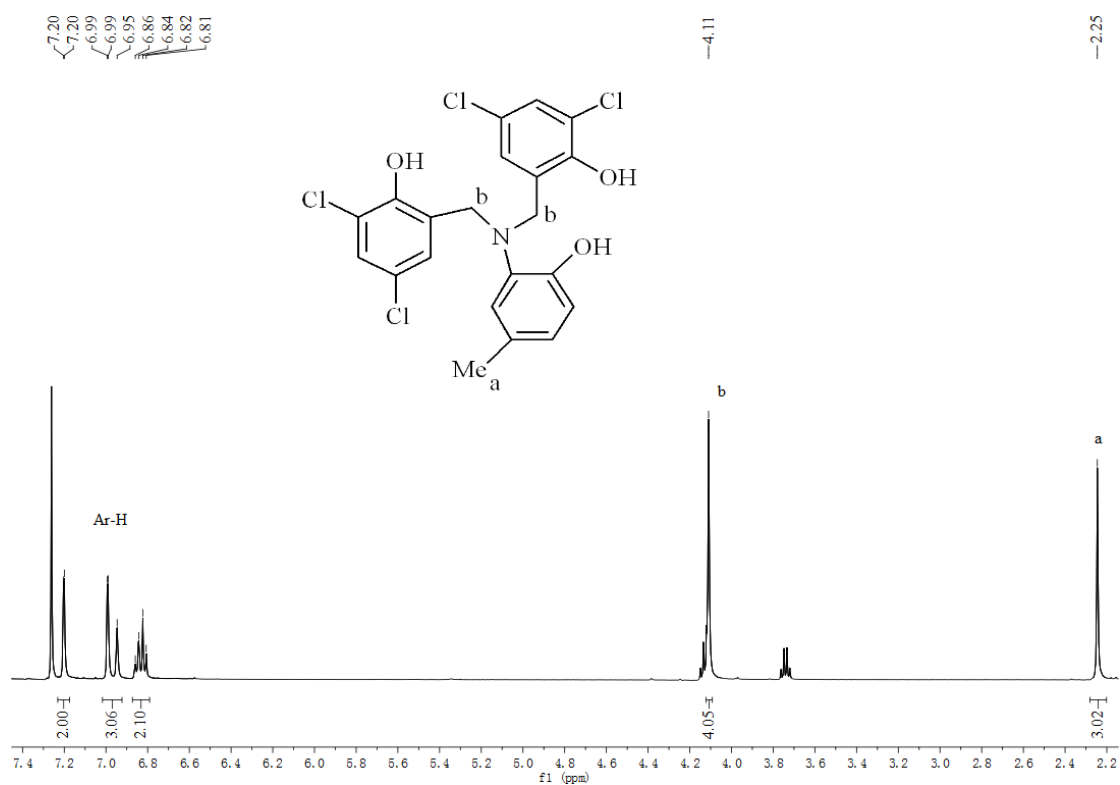

Figure S5.  $^1\text{H}$  NMR spectrum of ligand-3

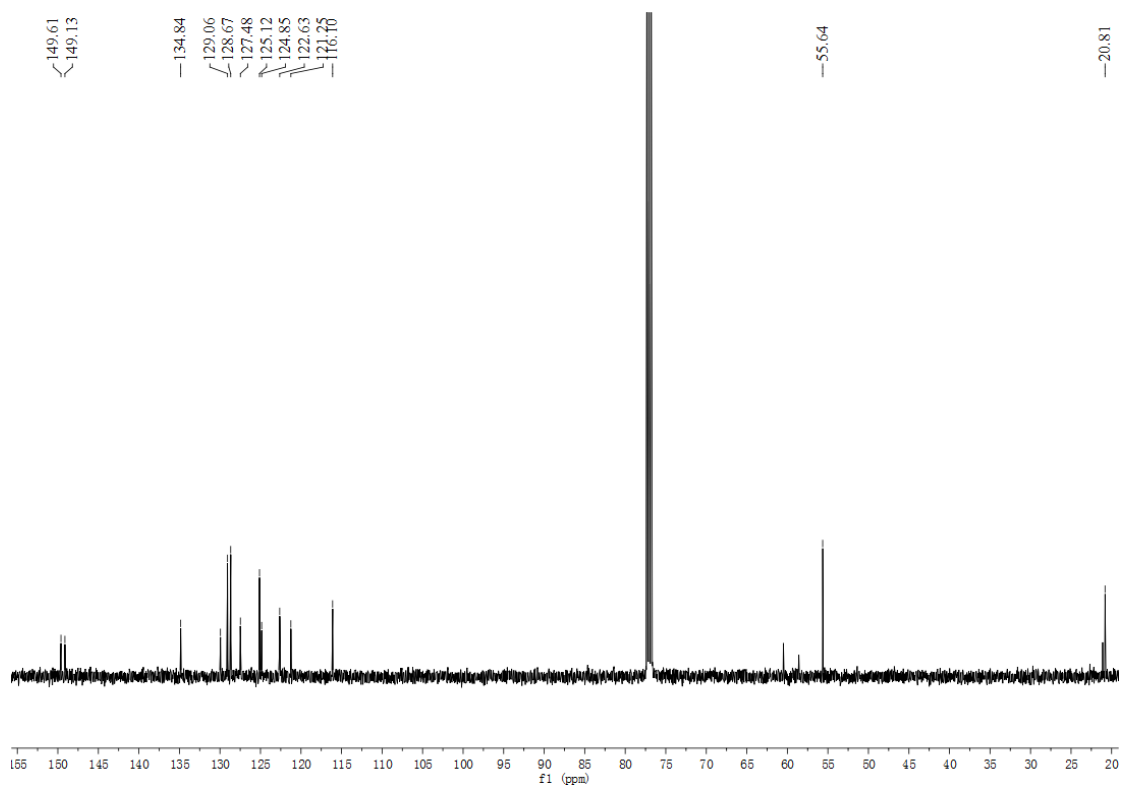

Figure S6.  $^{13}\text{C}$  NMR spectrum of ligand-3

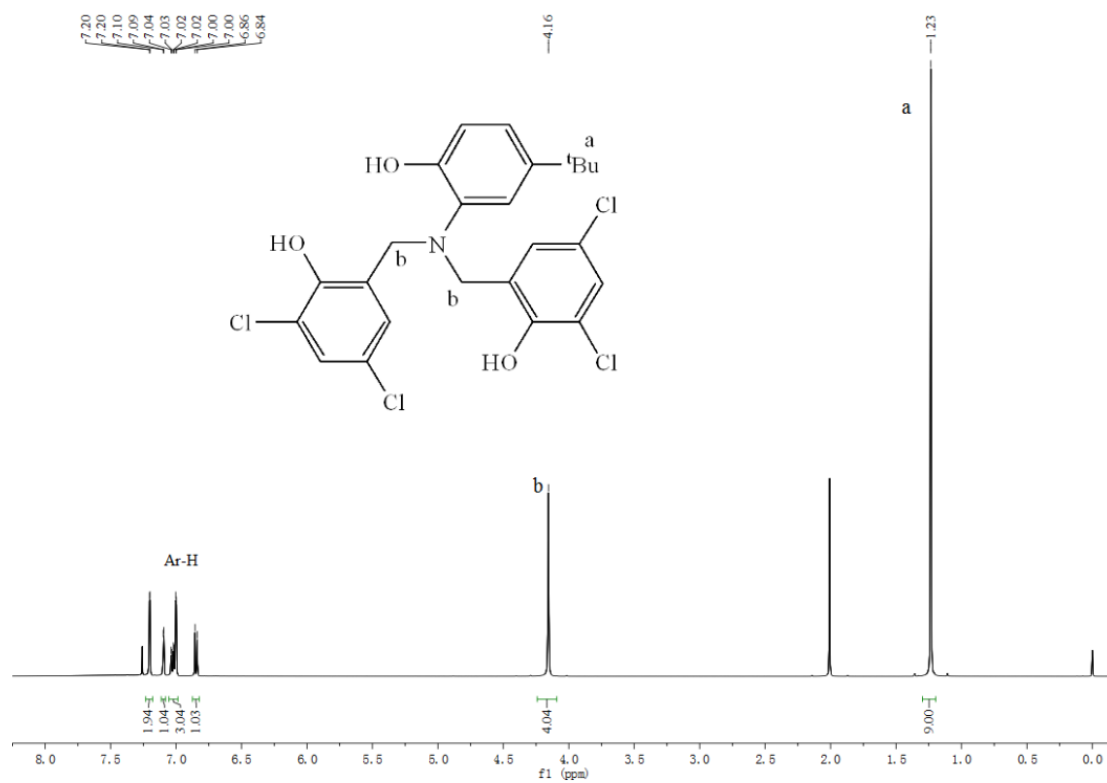

**Figure S7.** <sup>1</sup>H NMR spectrum of ligand-4

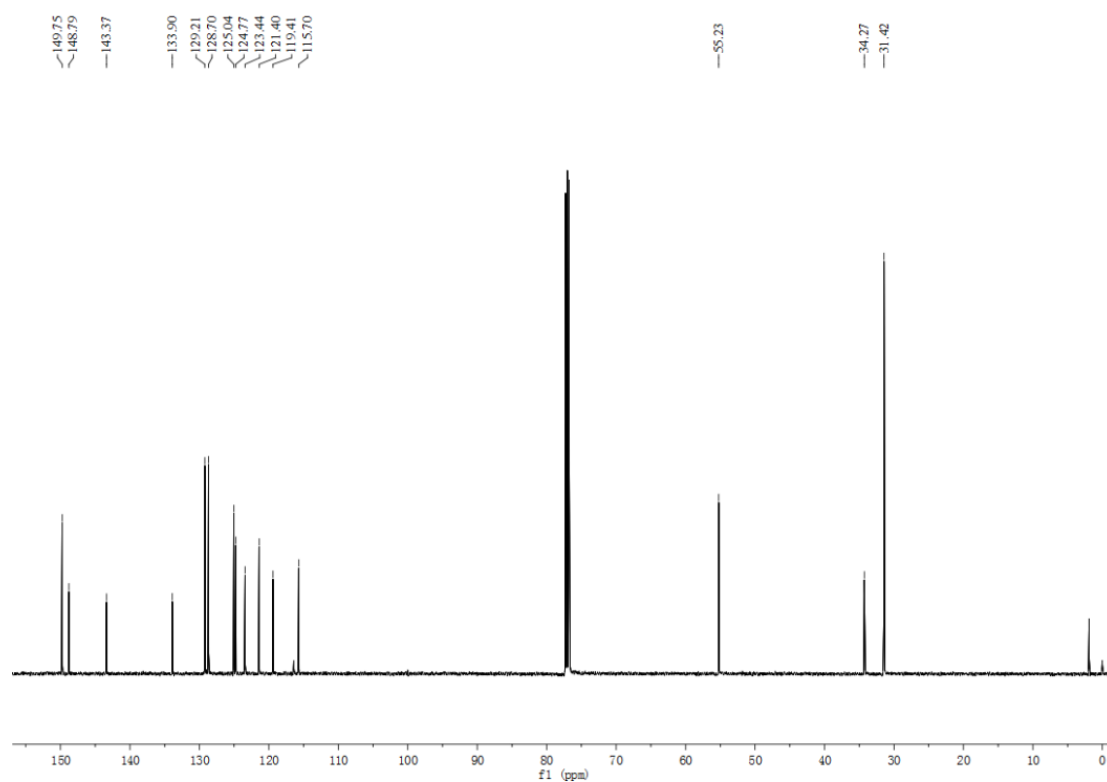

**Figure S8.** <sup>13</sup>C NMR spectrum of ligand-4



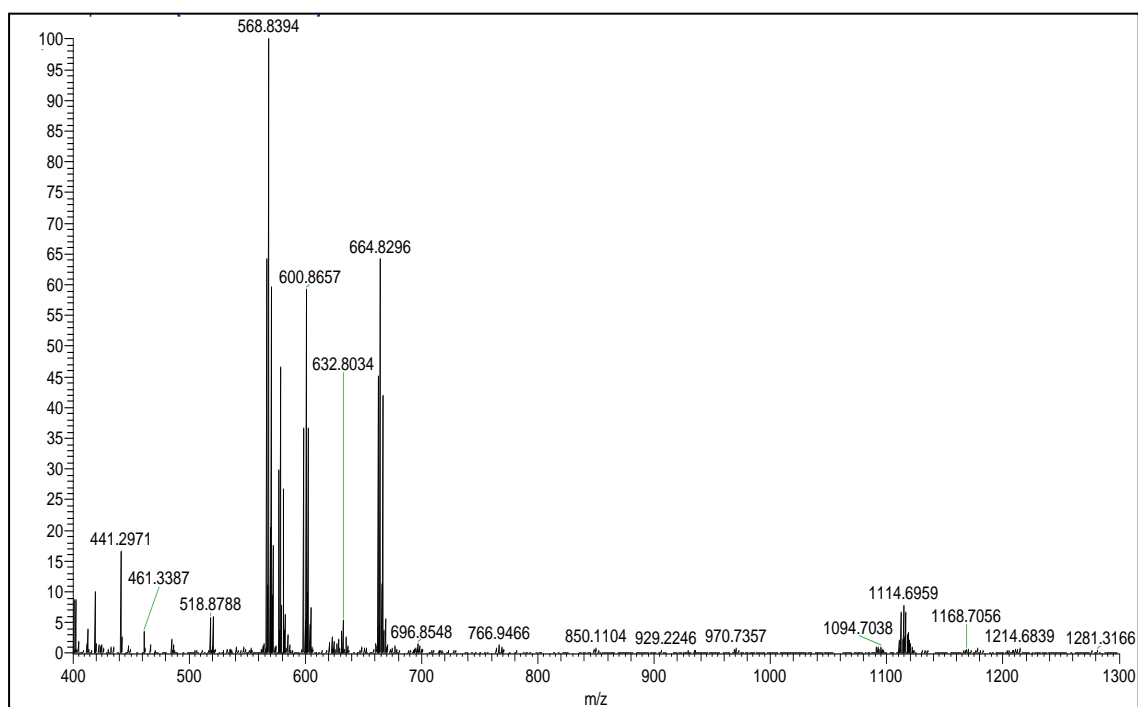

**Figure S9.** HRMS of complex-1 (positive mode)

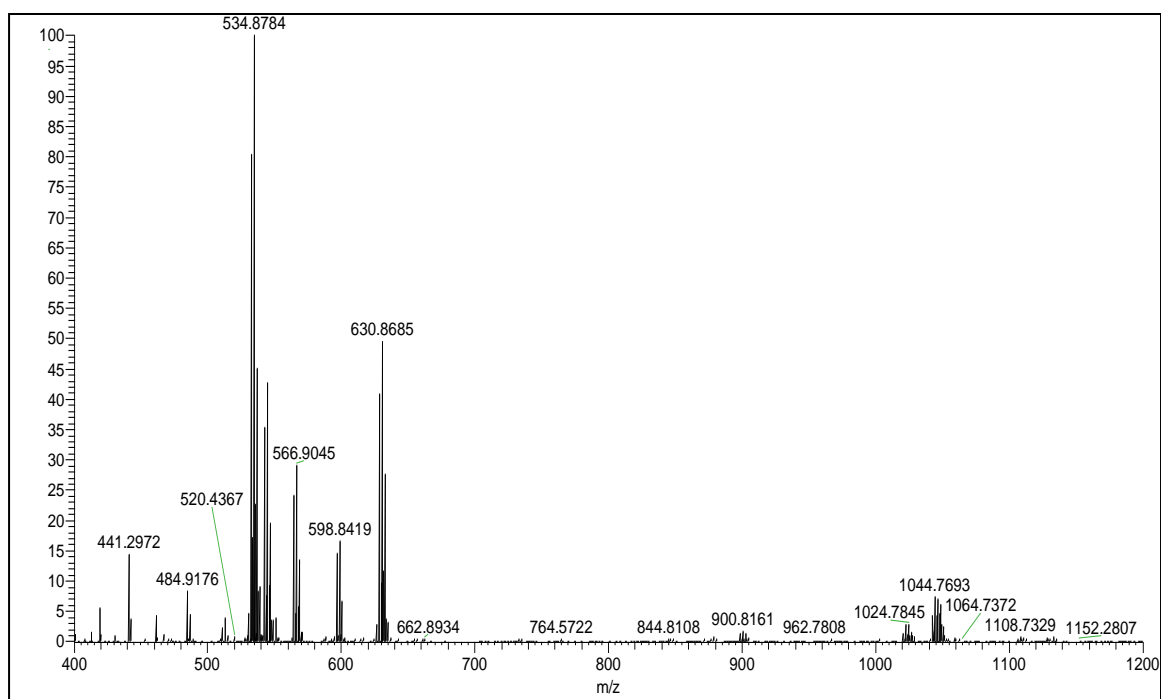

**Figure S10.** HRMS of complex-2 (positive mode)

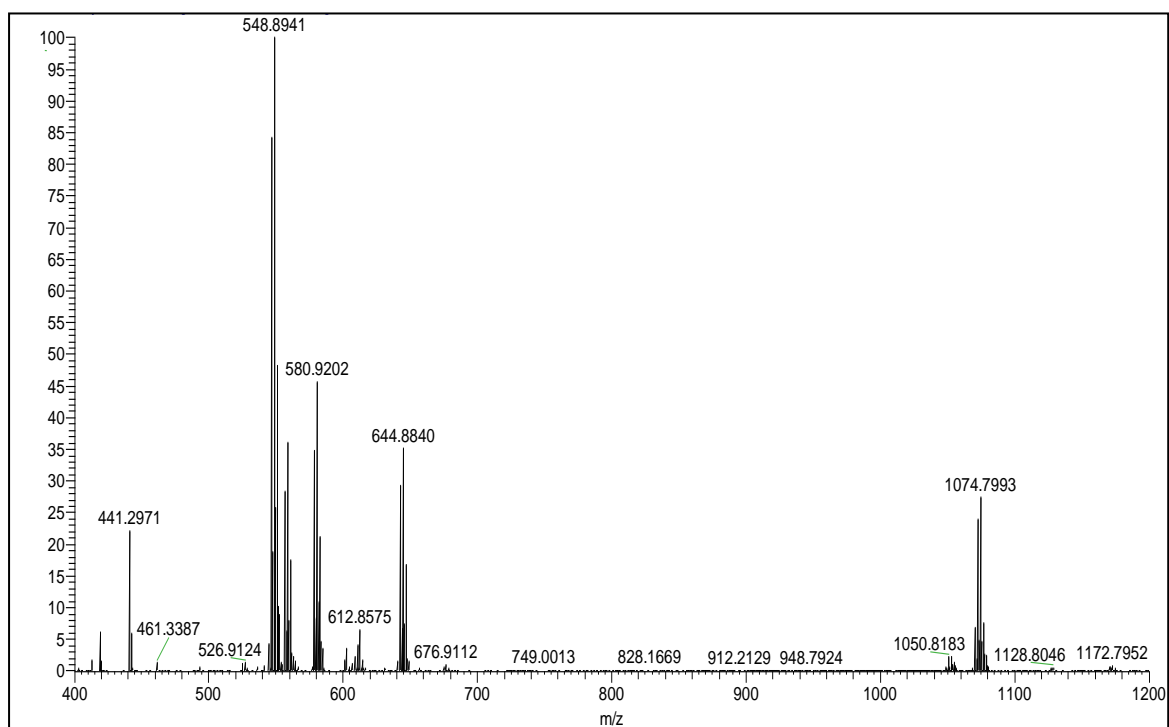

**Figure S11.** HRMS of complex-3 (positive mode)

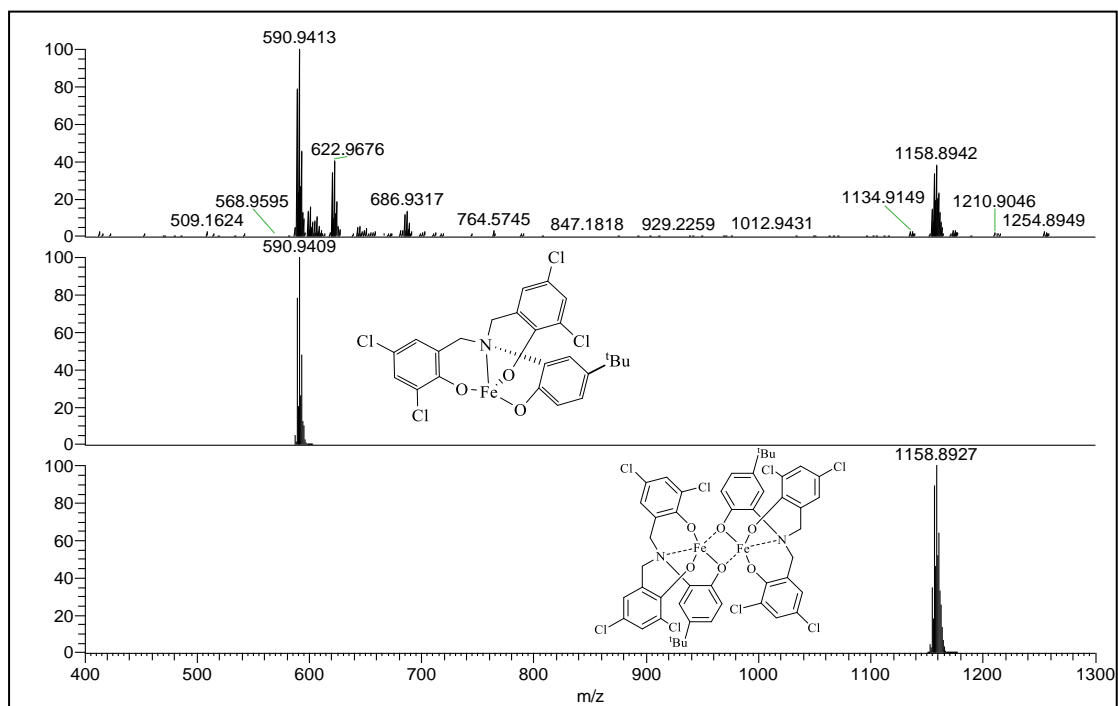

**Figure S12.** HRMS of complex-4 (positive mode)

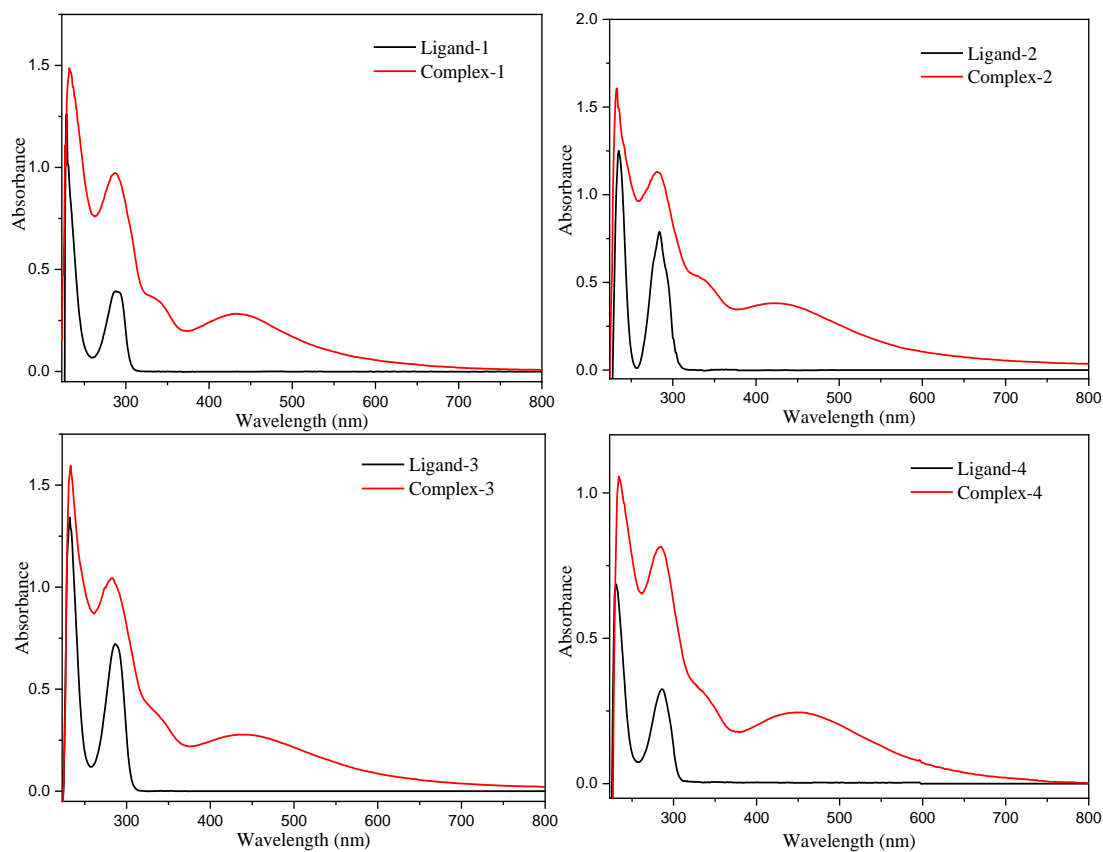

**Figure S13.** UV-vis spectra of ligands 1-4 and complexes 1-4

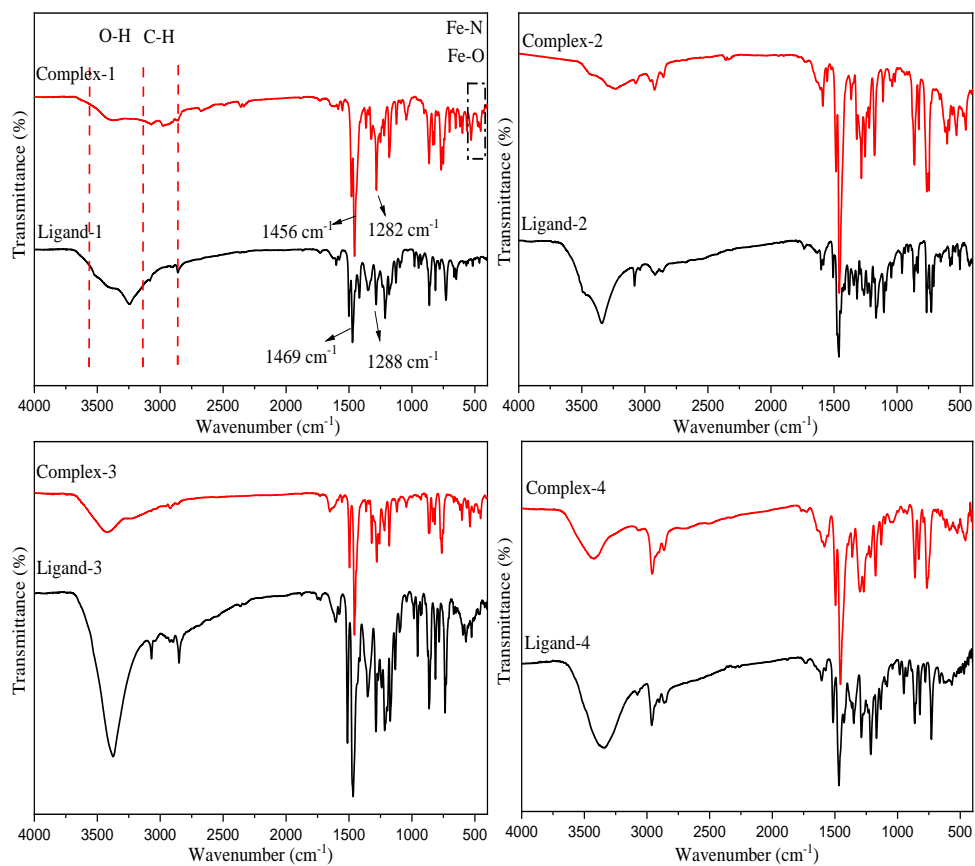

**Figure S14.** IR spectra of ligands 1-4 and complexes 1-4

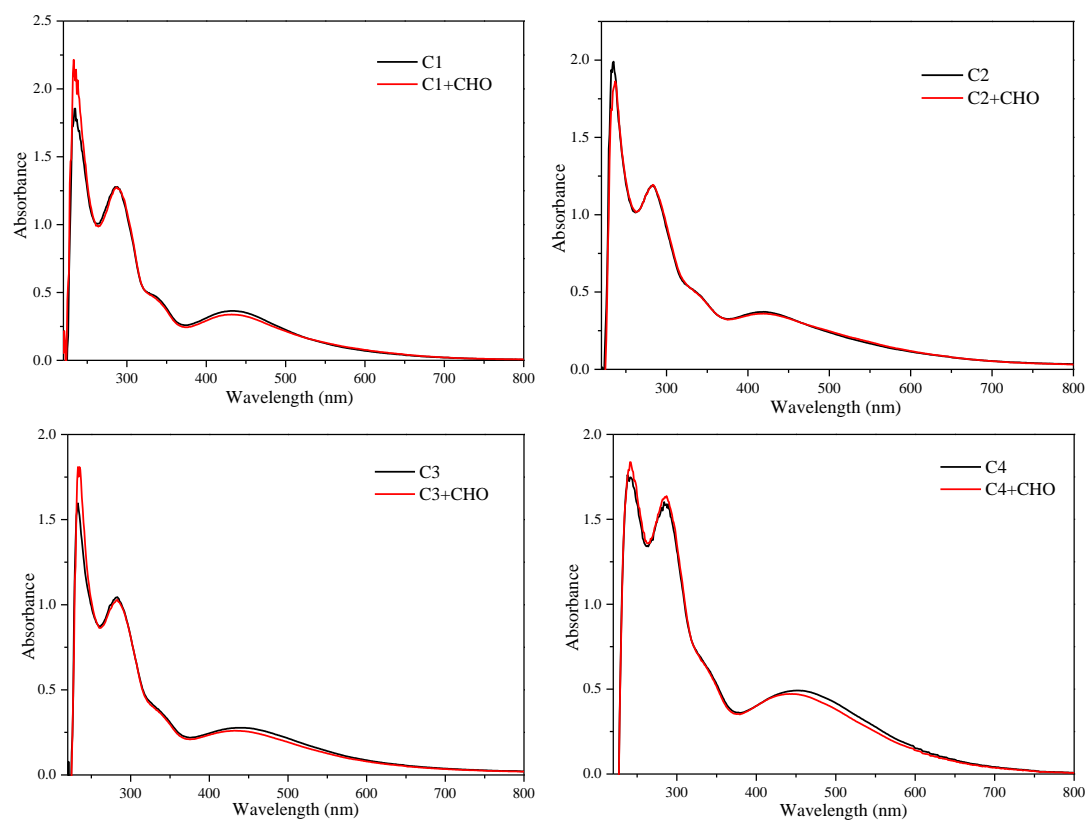

**Figure S15.** UV-vis spectra of complexes 1-4 titrated with 500 equivalent of CHO

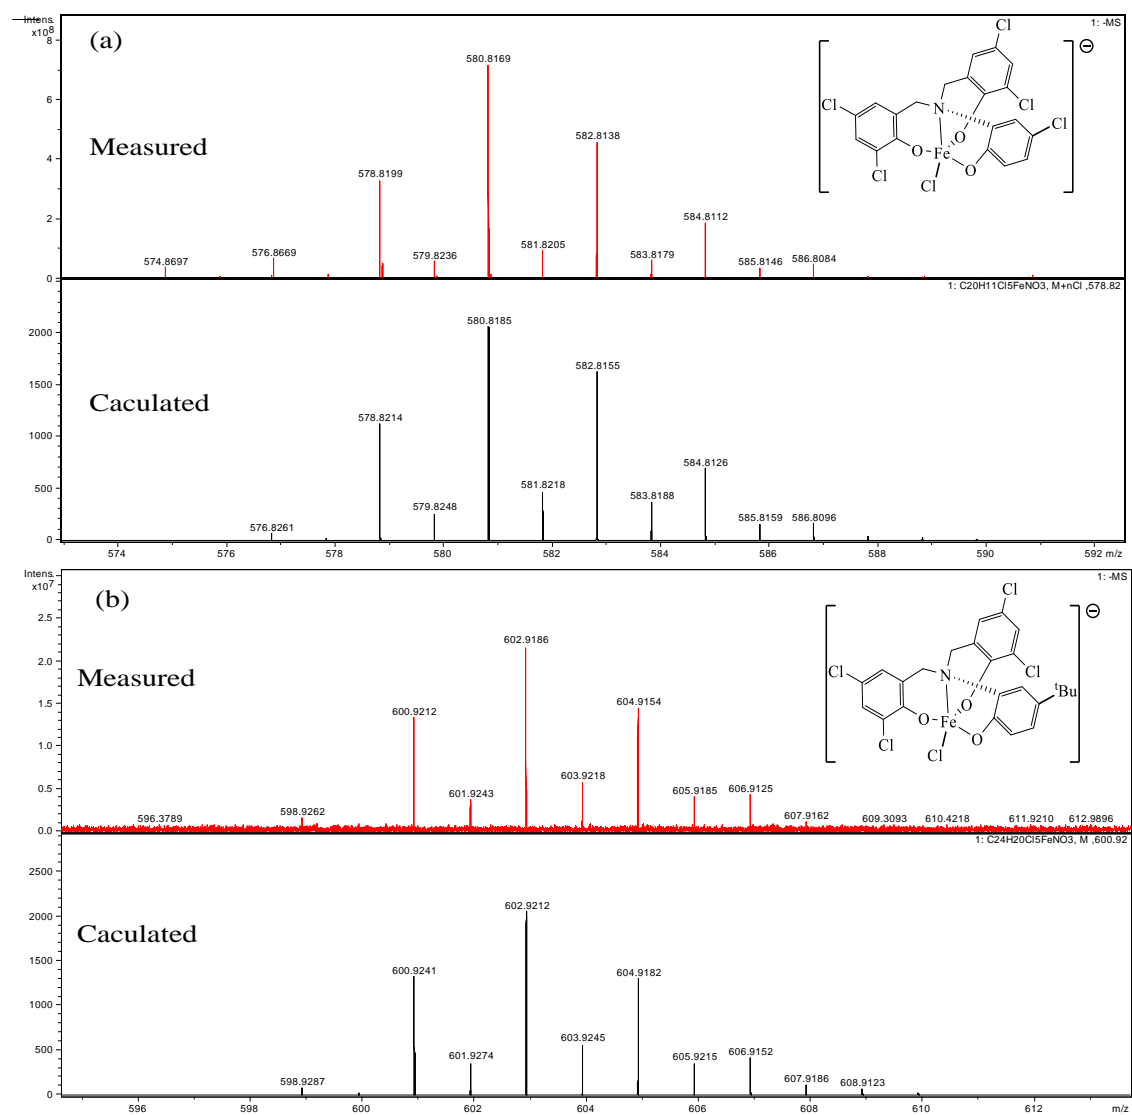

**Figure S16.** HRMS of (a) complex-1 and (b) complex-4 and PPNC1 in a molar ratio of 1:2  
(negative mode)

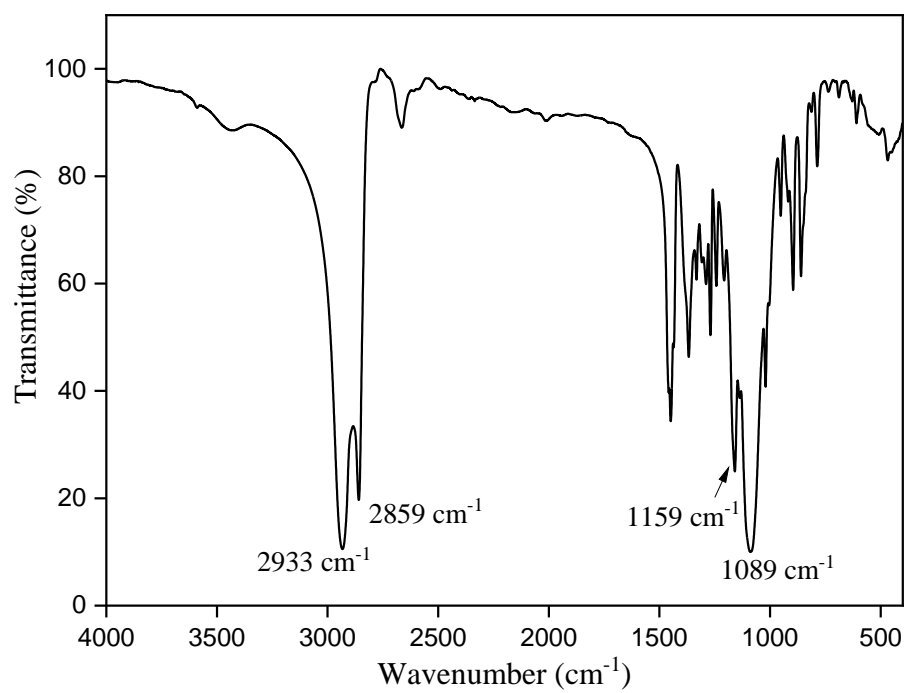

**Figure S17.** IR spectrum of PCHO

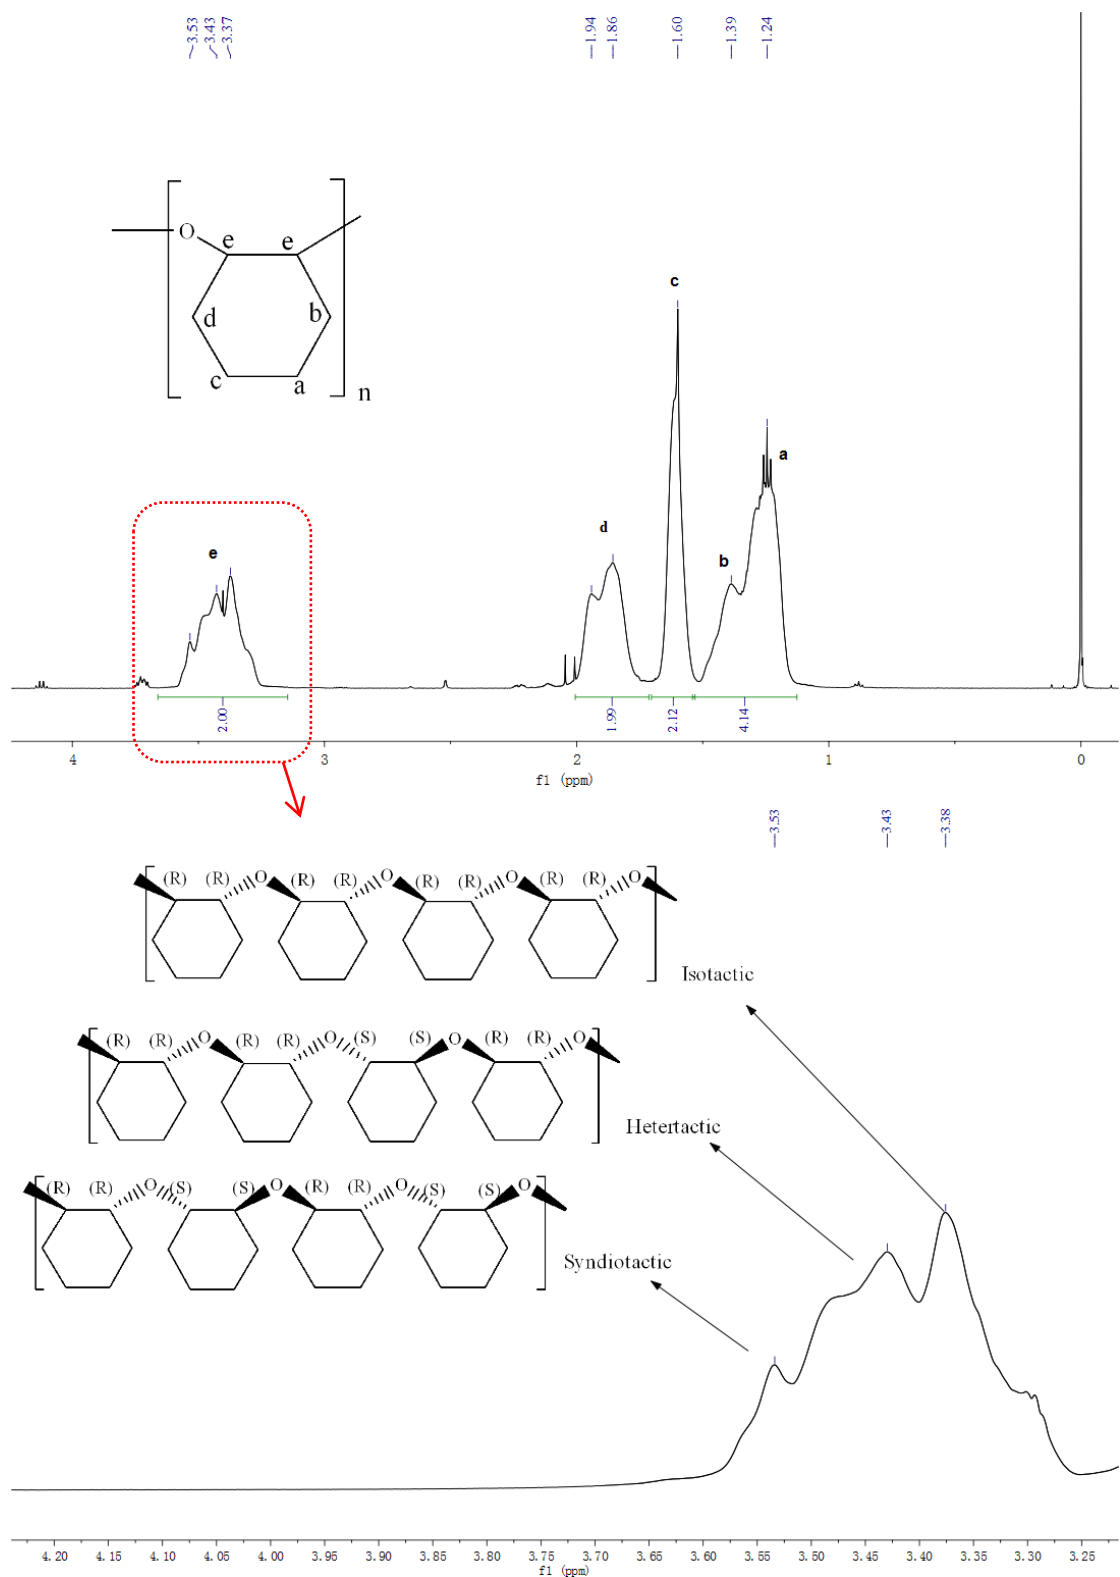

**Figure S18.**  $^1\text{H}$  NMR spectrum of PCHO

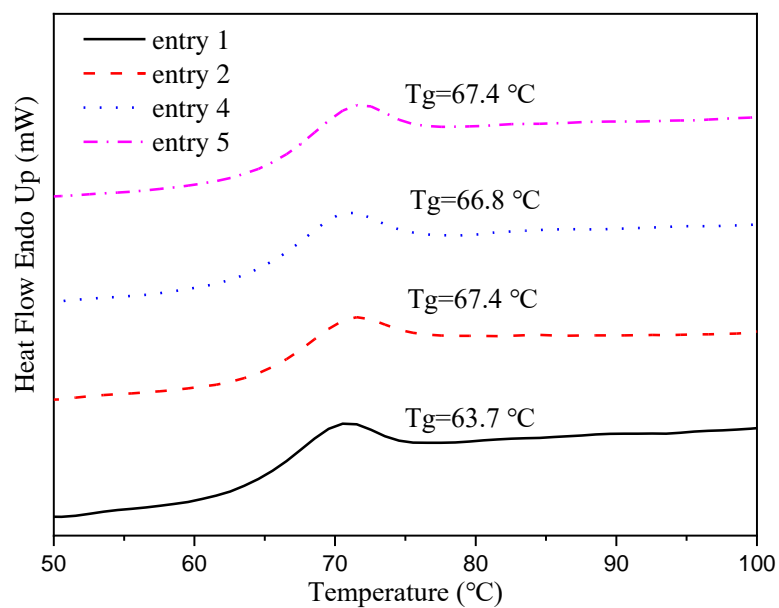

**Figure S19.** DSC polts of PCHO (Table 1)

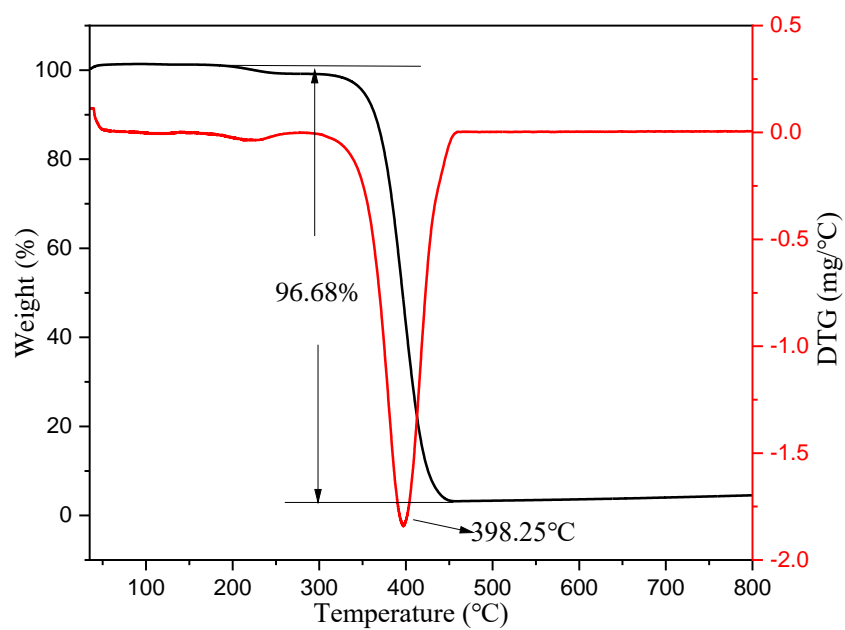

**Figure S20** TG and DTG curves of PCHO



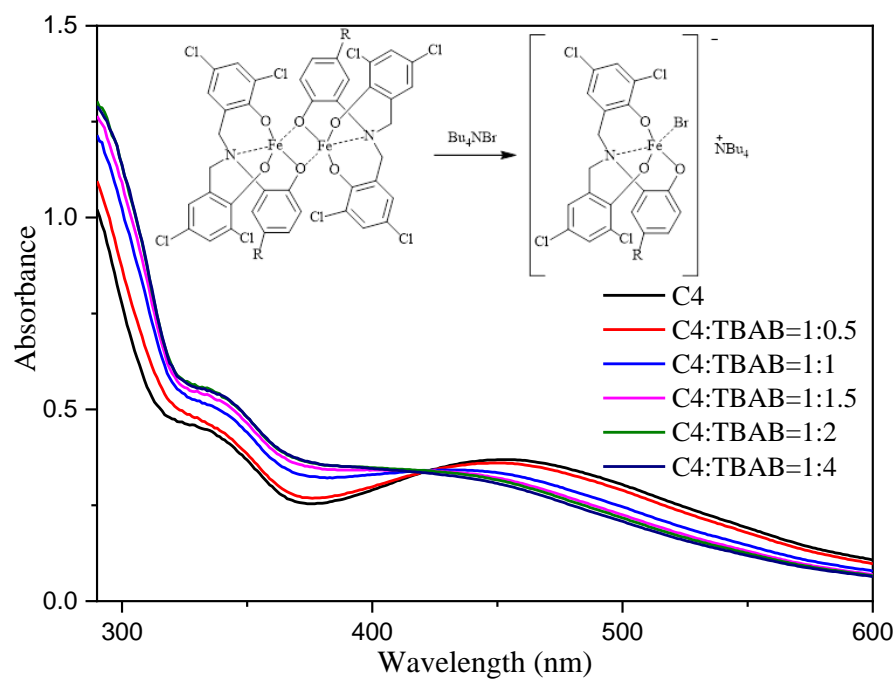

**Figure S21.** UV spectrum of complex C4 with different equivalent TBAB

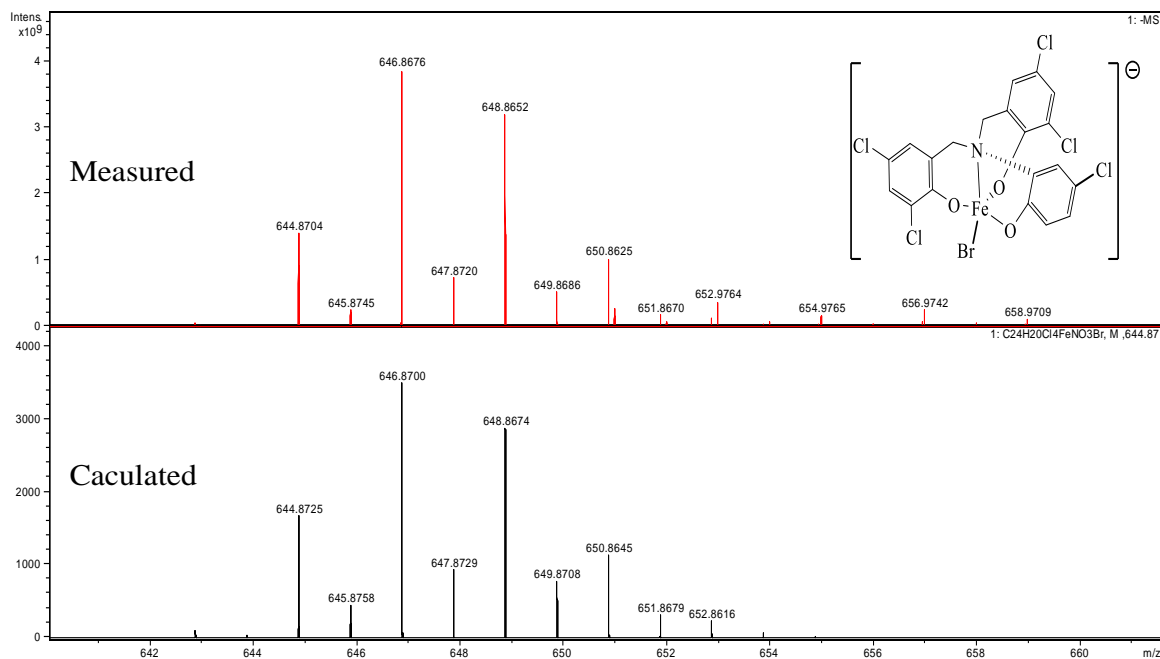

**Figure S22.** HRMS spectrum of complex C4 and TBAB in a molar ratio of 1:2 (Negative mode)

## Analysis of CHO ring opening polymerization

$$\text{Conversion of CHO (\%)} = \frac{I_{3.40}}{I_{3.12} + I_{3.40}} \times 100$$

$$\text{Yield (\%)} = \frac{\text{Weight of CHO}}{\text{Weight of product}} \times 100\%$$

$$\text{TOF (h}^{-1}\text{)} = \frac{\text{mol of CHO consumed}}{\text{mol of Fe center} \cdot \text{h}}$$

## Analysis of CHO/CO<sub>2</sub> cycloaddition reactions:

Examples of <sup>1</sup>H NMR spectra used for determining the conversion of CHO.

$$\text{Conversion of CHO (\%)} = \frac{I_{4.55-4.75} + I_{4.63} + I_{4.09} + I_{3.40}}{I_{4.55-4.75} + I_{4.63} + I_{4.09} + I_{3.40} + I_{3.12}} \times 100\%$$

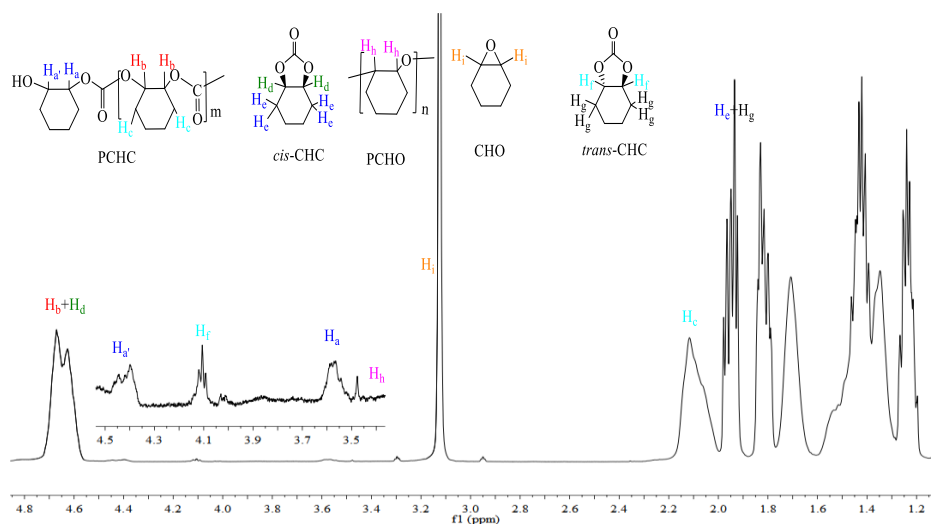

**Figure S23.** <sup>1</sup>H NMR spectrum of the crude reaction mixture of CHO/CO<sub>2</sub> copolymerization in CDCl<sub>3</sub>

Examples of FT-IR spectra used for determining the ratio between cyclic cyclohexene carbonate (CHC) and poly(cyclohexene carbonate) (PCHC):

$$A_{1742} = \log \frac{T_0}{T_1}$$

$$A_{1802} = \log \frac{T_0}{T_2}$$

$$cis\text{-CHC (\%)} = \frac{A_{1742}}{A_{1742} + A_{1802}} \times 100$$

where  $T_0$  is transmittance of the baseline and  $T_1$  is transmittance of the C=O band at  $1742\text{ cm}^{-1}$ , and  $T_2$  is transmittance of the C=O band at  $1802\text{ cm}^{-1}$

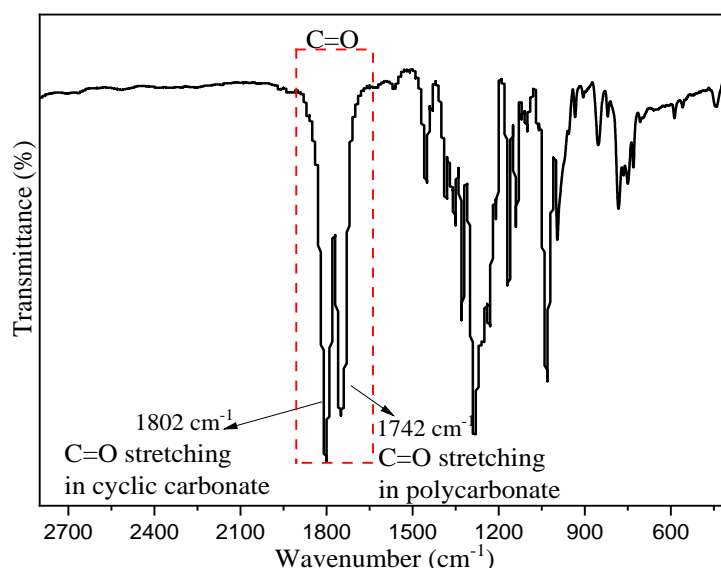

**Figure S24.** FT-IR spectrum of crude reaction mixture of CHO/CO<sub>2</sub>

## Reference

- [1] Basu D, Allard M M, Xavier F R, et al. Modulation of electronic and redox properties in phenolate-rich cobalt(iii) complexes and their implications for catalytic proton reduction[J]. Dalton Transactions, 2015,44(7):3454-3466.
